# Supplementary material
Source: PubMed Central journal article supplement (PMC1934392)
Supplement: pgen.0030117.st001.pdf [file pgen.0030117.st001.pdf]

**TABLE S1. Bacterial strains and plasmids**

| Plasmid or strain | Relevant properties                                                                                                                                                                                                                                                               | Origin    |
|-------------------|-----------------------------------------------------------------------------------------------------------------------------------------------------------------------------------------------------------------------------------------------------------------------------------|-----------|
| <b>Plasmids</b>   |                                                                                                                                                                                                                                                                                   |           |
| pCL52             | Em <sup>R</sup> , a 2.4-kb <i>E. coli</i> cloning vector derived from pBluescript KSII                                                                                                                                                                                            | [1]       |
| PGh9              | Em <sup>R</sup> , a 3.7-kb lactococcal <i>repA</i> <sup>ts</sup> cloning vector                                                                                                                                                                                                   | [2]       |
| pFC23             | Cm <sup>R</sup> , pKO3-derivative plasmid ( <i>repA</i> <sup>ts</sup> ) containing the <i>rpsL</i> <sup>+</sup> gene. Used for replacement of the <i>E. coli dif</i> site by allelic exchange                                                                                     | [3]       |
| pFX170            | Ap <sup>R</sup> , full-length <i>E. coli</i> FtsK protein fused to a FLAG epitope on its N-terminus and cloned into pBAD24 vector                                                                                                                                                 | [4]       |
| pFX144            | Cm <sup>R</sup> , pKO3-derivative ( <i>repA</i> <sup>ts</sup> ) plasmid. Used for allelic exchange at <i>xerC</i> locus in <i>E. coli</i>                                                                                                                                         | [5]       |
| pCL231            | Em <sup>R</sup> , pGh9-derivative ( <i>repA</i> <sup>ts</sup> ) plasmid. Contains a 37-bp fragment, <i>dif-2</i> (5'-TAACATCTTTCCgAAAAACTgTAA <b>TTTTCTTgACAAT</b> -3') cloned at the <i>XmaI</i> site (the 31-bp lactococcal <i>dif</i> <sub>SL</sub> site is indicated in bold) | This work |
| pCL235            | Em <sup>R</sup> , pCL52-derivative plasmid. Contains the same 37-bp synthetic fragment than pCL231                                                                                                                                                                                | This work |
| pCL237            | Em <sup>R</sup> , pCL52-derivative plasmid. Contains a 27-bp lactococcal <i>dif</i> <sub>SL</sub> variant, <i>dif-8</i> (5'- <b>CTTTCCgAAAACTgTAATTTTCTTgA</b> -3') of pCL233 (see Table 2) cloned at the <i>XmaI</i> site                                                        | This work |
| pCL263            | Em <sup>R</sup> , 5.35-kb <i>XbaI</i> - <i>ClaI</i> fragment from pFX170 (containing                                                                                                                                                                                              | This work |

the FLAG-tagged full-length *ftsK* gene of *E. coli*, the araBAD promoter, and the *araC* gene) cloned at the corresponding sites of pCL52

|           |                                                                                                                                                                                                                                                                      |                                 |
|-----------|----------------------------------------------------------------------------------------------------------------------------------------------------------------------------------------------------------------------------------------------------------------------|---------------------------------|
| pCL294    | Cm <sup>R</sup> , 2.04-kb <i>dif-2</i> -Km <sup>R</sup> - <i>dif-2</i> cassette cloned at the <i>XmnI</i> site of pFC23. Used for introducing the cassette at the <i>E. coli dif</i> locus                                                                           | This work                       |
| pCL297    | Cm <sup>R</sup> , lactococcal <i>xerS</i> ORF ( <i>ymfD</i> ) cloned into one <i>NcoI</i> site of pFX144. <i>xerS</i> is expressed from transcriptional read-through of the upstream <i>cat</i> gene                                                                 | This work                       |
| pCL403    | Em <sup>R</sup> , pGh9-derivative ( <i>repA</i> <sup>ts</sup> ) plasmid. Contains a 37-bp fragment (5'-TAACATCTTTCC <b>gAAAACTATAATTT TCTTgAAAAA</b> -3') cloned at the <i>XmaI</i> site (the 31-bp pneumococcal <i>dif</i> <sub>SL</sub> site is indicated in bold) | This work                       |
| pKNtergfp | Em <sup>R</sup> , 181 first amino acids of the lactococcal FtsK protein fused to Gfpmut1 and expressed from P <sub>nisA</sub> of pNG8048e vector                                                                                                                     | N. Campo, laboratory collection |
| pKFLgfp   | Em <sup>R</sup> , full-length lactococcal FtsK protein fused to Gfpmut1 and expressed from P <sub>nisA</sub> of pNG8048e vector                                                                                                                                      | N. Campo, laboratory collection |

## Strains

### *L. lactis*

|         |                                                                               |     |
|---------|-------------------------------------------------------------------------------|-----|
| MG1363  | Wild Type strain. Plasmid-free derivative strain of NCDO712                   | [6] |
| VEL1122 | Tc <sup>R</sup> , MG1363 <i>recA::tetM</i>                                    | [7] |
| NZ9000  | MG1363 <i>pepN::nisRK</i> . Recipient strain for the nisin expression system. | [8] |

*S. pneumoniae*

|      |                                                     |           |
|------|-----------------------------------------------------|-----------|
| R800 | Wild Type strain. Derivative of strain R6           | [9]       |
| S501 | R800 <i>xerS</i> (spr1046:: <i>Km</i> )             | This work |
| S502 | R800 <i>ftsK<sub>C</sub></i> (spr0781:: <i>Km</i> ) | This work |

*E. coli*

|        |                                                                                                                                                                                                                        |                                  |
|--------|------------------------------------------------------------------------------------------------------------------------------------------------------------------------------------------------------------------------|----------------------------------|
| LN2772 | Str <sup>R</sup> , Tc <sup>R</sup> , W1485 <i>leu thyA deoB</i> or <i>C supE rpsL</i><br>$\Delta(dif)58::Tc$                                                                                                           | [3]                              |
| LN3038 | Str <sup>R</sup> , Tc <sup>R</sup> , W1485 <i>leu thyA deoB</i> or <i>C supE rpsL lacZ::Tn10</i> .<br>This strain has a wild type phenotype for XerCD/ <i>dif</i> recombination.                                       | F. Cornet, laboratory collection |
| E359   | Str <sup>R</sup> , Km <sup>R</sup> , LN2772 with the lactococcal <i>dif-2-Km<sup>R</sup>-dif-2</i> cassette inserted in the <i>tetA</i> gene                                                                           | This work                        |
| E367   | Str <sup>R</sup> , Tc <sup>R</sup> , Cm <sup>R</sup> , LN2772 containing pCL297                                                                                                                                        | This work                        |
| E368   | Str <sup>R</sup> , Cm <sup>R</sup> , E359 with one <i>dif<sub>SL</sub></i> site (the Km <sup>R</sup> cassette has been excised by XerS/ <i>dif<sub>SL</sub></i> recombination) and containing pCL297                   | This work                        |
| E372   | Str <sup>R</sup> , Km <sup>R</sup> , Ap <sup>R</sup> , E359 <i>ftsK<sub>C</sub>::Ap</i>                                                                                                                                | This work                        |
| E375   | Str <sup>R</sup> , Tc <sup>R</sup> , Cm <sup>R</sup> , LN3038 containing pCL297                                                                                                                                        | This work                        |
| E378   | Str <sup>R</sup> , Ap <sup>R</sup> , Cm <sup>R</sup> , E372 with one <i>dif<sub>SL</sub></i> site (the Km <sup>R</sup> cassette has been excised by XerS/ <i>dif<sub>SL</sub></i> recombination) and containing pCL297 | This work                        |
| E379   | Str <sup>R</sup> , Km <sup>R</sup> , Tc <sup>R</sup> , E359 <i>recA56</i>                                                                                                                                              | This work                        |
| E408   | Str <sup>R</sup> , Km <sup>R</sup> , Ap <sup>R</sup> , Tc <sup>R</sup> , E359 <i>xerC::Ap</i>                                                                                                                          | This work                        |
| E409   | Str <sup>R</sup> , Km <sup>R</sup> , Ap <sup>R</sup> , Tc <sup>R</sup> , E359 <i>xerD::Ap</i>                                                                                                                          | This work                        |

---

## References for Table S1

1. Campo N, Daveran-Mingot M-L, Leenhouts KJ, Ritzenthaler P, Le Bourgeois P (2002) Cre/*loxP* recombination system for large genome rearrangements in *Lactococcus lactis*. Appl Environ Microbiol 68: 2359-2367.
2. Maguin E, Prévots H, Ehrlich SD, Gruss A (1996) Efficient insertional mutagenesis in *Lactococci* and other Gram-positive bacteria. J Bacteriol 178: 931-935.
3. Cornet F, Mortier I, Patte J, Louarn JM (1994) Plasmid pSC101 harbors a recombination site, *psi*, which is able to resolve plasmid multimers and to substitute for the analogous chromosomal *Escherichia coli* site *dif*. J Bacteriol 176: 3188-3195.
4. Yates J, Aroyo M, Sherratt DJ, Barre FX (2003) Species specificity in the activation of Xer recombination at *dif* by FtsK. Mol Microbiol 49: 241-249.
5. Aussel L, Barre FX, Aroyo M, Stasiak A, Stasiak AZ et al. (2002) FtsK is a DNA motor protein that activates chromosome dimer resolution by switching the catalytic state of the XerC and XerD recombinases. Cell 108: 195-205.
6. Gasson MJ (1983) Plasmid complements of *Streptococcus lactis* NCDO712 and other lactic *Streptococci* after protoplast-induced curing. J Bacteriol 154: 1-9.
7. Duwat P, Ehrlich SD, Gruss A (1995) The *recA* gene in *Lactococcus lactis*: characterization and involvement in oxydative and thermal stress. Mol Microbiol 17: 1121-1131.
8. Kuipers OP, de Ruyter PG, Kleerebezem M, de Vos WM (1998) Quorum sensing-controlled gene expression in lactic acid bacteria. J Biotechnol 64: 15-21.

9. Lefevre JC, Claverys JP, Sicard AM (1979) Donor deoxyribonucleic acid length and marker effect in pneumococcal transformation. *J Bacteriol* 138: 80-86.
