# Supplementary material
Source: PubMed Central journal article supplement (PMC1934392)

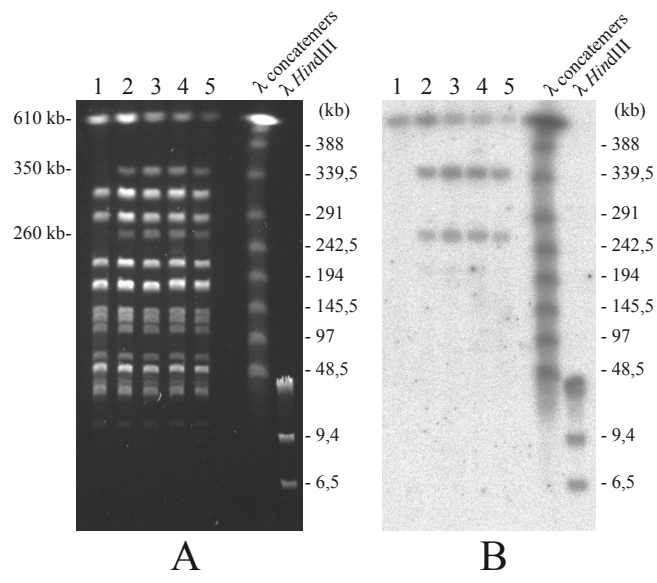

Fig. S1

Supplement: pgen.0030117.sg001.pdf [file pgen.0030117.sg001.pdf]

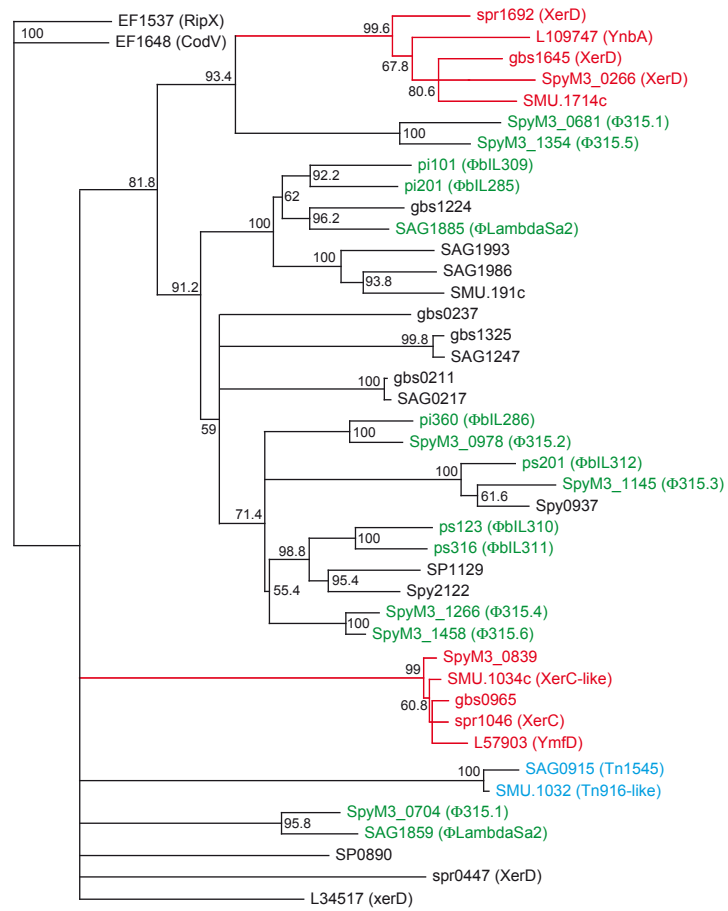

0.1

Fig. S2

Supplement: pgen.0030117.sg002.pdf [file pgen.0030117.sg002.pdf]
